# Supplementary material for: Electrospray prepared flexible CsPbBr3 perovskite film for efficient X-ray detection
Source: Royal Society of Chemistry journal article supplement (doi:10.1039/d3tc01347b), 2023-01-01
Supplement: d3tc01347b1.pdf [file d3tc01347b1.pdf]

## Supporting Information

### **Electrospray Prepared Flexible CsPbBr<sub>3</sub> Perovskite Film for efficient X-ray Detection**

Sixin Chen<sup>1,2</sup>, Weiwei Liu<sup>1\*</sup>, Meng Xu<sup>2</sup>, Pan Shi<sup>1</sup>, Menghua Zhu<sup>2\*</sup>

<sup>1</sup>School of metallurgy, Xi'an University of Architecture and Technology, Xi'an 710055, China

<sup>2</sup>State Key Laboratory of Solidification Processing, and School of Materials Science and Engineering, Northwestern Polytechnical University, Xi'an 710072, China

\*Email: [liuww0000@163.com](mailto:liuww0000@163.com) (W. Liu), [mhzhzhu@nwpu.edu.cn](mailto:mhzhzhu@nwpu.edu.cn) (M. Zhu)

#### **Keywords:**

CsPbBr<sub>3</sub> perovskite film, X-ray detection, flexible, electrospray.

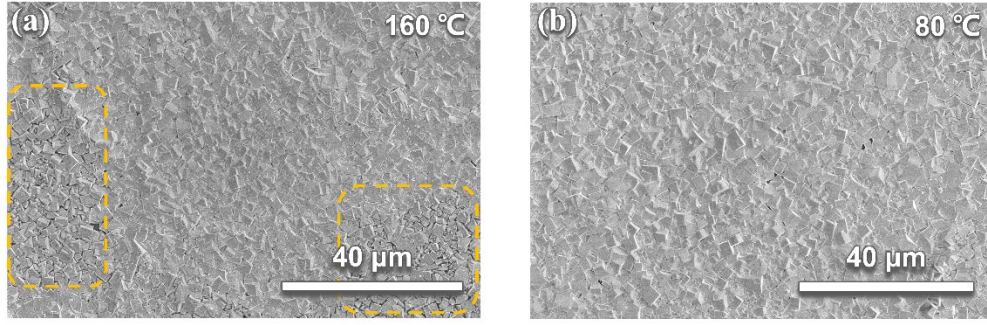

**Fig. S1** (a-b) SEM images of the low-magnification morphology of the film at 160 °C and 80 °C.

### Calculation of resistivity for interdigital detectors

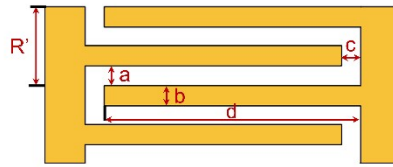

**Fig. S2** Schematic diagram of partial cycle interdigital electrode

$$\frac{1}{R'} = \frac{4}{b \left( \frac{2c}{d-c} + 1 \right) R_f} + \frac{4}{c \left( \frac{2b}{a} + 1 \right) R_f}$$

$$\frac{1}{R} = \frac{n}{R'}$$

$$R_f = \frac{\rho}{\delta}$$

$R'$  is single periodic parallel resistance and  $R_f$  is square resistance.  $R$  is total resistance of the  $\text{CsPbBr}_3$  film from the experiment and  $n$  is the repetition period of the parallel resistance.  $\delta$  is the thickness of the film and  $\rho$  is resistivity of the film. Specifically, the values of  $a$ ,  $b$ ,  $c$  for the interdigital electrode are 0.5 mm. The value of  $d$  is 6.5 mm, the repetition period of electrode structure ( $n$ ) is 4.5 and the thickness of the film is 3  $\mu\text{m}$ .

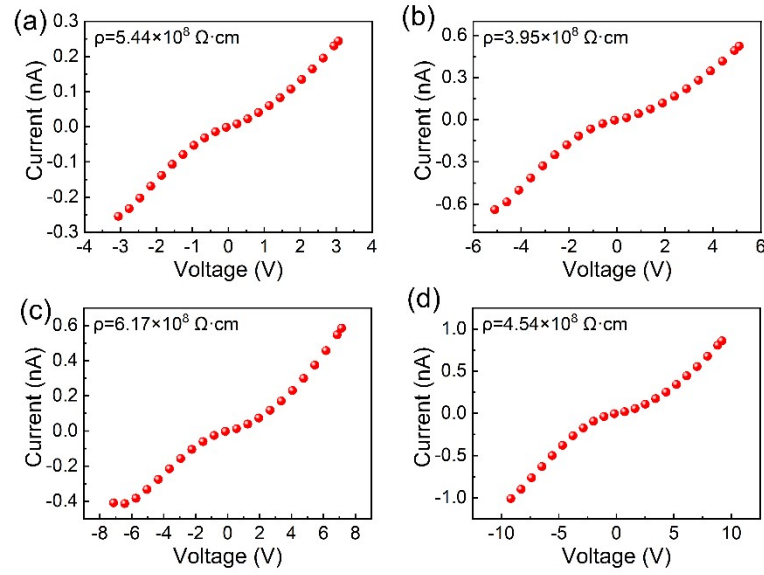

**Fig. S3** (a-d) I-V curves of CsPbBr<sub>3</sub> film under different background voltage.

### Calculation of the average attenuation efficiency ( $\bar{\varepsilon}$ ) of CsPbBr<sub>3</sub> film

X-ray tube voltage determines the energy of the X-ray photons. The source of X-ray tube voltages used in this work is 20 kV<sub>p</sub> and 50 kV<sub>p</sub> and the energy distributions of 20 kV<sub>p</sub> and 50 kV<sub>p</sub> were evaluated utilizing the software (SPEKTR 3.0) downloaded from <http://istar.jhu.edu/downloads/>, as shown in Fig. S4a. The average X-ray photon energy of 20 kV<sub>p</sub> and 50 kV<sub>p</sub> are 17.9 keV and 29.0 keV separately. Considering that CsPbBr<sub>3</sub> film cannot have sufficient thickness (3 μm) to absorb X-ray photons, the average attenuation efficiency ( $\bar{\varepsilon}$ ) is needed to carefully calculate below.

Initially, the single energy X-ray attenuation efficiency ( $\varepsilon$ ) can be calculated by  $\varepsilon = 1 - e^{-\mu x}$ , where  $x$  is the thickness of CsPbBr<sub>3</sub> film and  $\mu$  is the absorption coefficient of CsPbBr<sub>3</sub> film. Fig. S4b reveals the absorption coefficient ( $\mu$ ) of CsPbBr<sub>3</sub> originated from X-COM database by NIST. When the thickness of CsPbBr<sub>3</sub> film is 3 μm, the diagram of the attenuation efficiency versus incident photon energy is illustrated in Fig. S4c. Therefore, to evaluate the average attenuation efficiency of CsPbBr<sub>3</sub>, the relationship between the attenuation efficiency versus thickness with the tube voltage of 20 kV<sub>p</sub> and 50 kV<sub>p</sub>, is exhibited in Fig. S4d. The average attenuation efficiency ( $\bar{\varepsilon}$ ) of CsPbBr<sub>3</sub> film (3 μm) results for 20 kV<sub>p</sub> and 50 kV<sub>p</sub> are 10.51 % and 2.71 %.

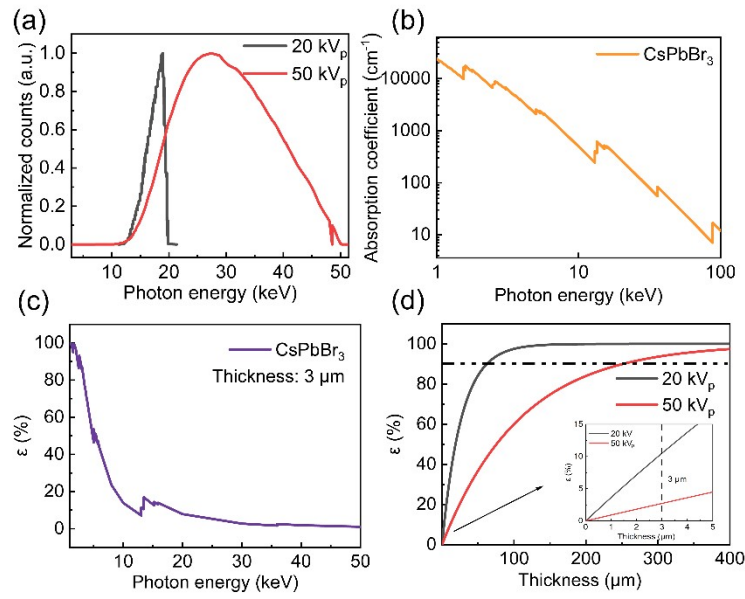

**Fig. S4** (a) X-ray photon energy distribution at the tube voltage of 20 kV<sub>p</sub> and 50 kV<sub>p</sub>. (b) Absorption coefficient ( $\mu$ ) of CsPbBr<sub>3</sub> ranged from 1-100 keV utilizing X-COM by NIST. (c) Calculated attenuation efficiency ( $\epsilon$ ) of CsPbBr<sub>3</sub> with a thickness of 3  $\mu\text{m}$  versus X-ray photon energy. (d) Calculated attenuation efficiency ( $\epsilon$ ) of CsPbBr<sub>3</sub> versus thickness with the tube voltage of 20 kV<sub>p</sub> and 50 kV<sub>p</sub>.

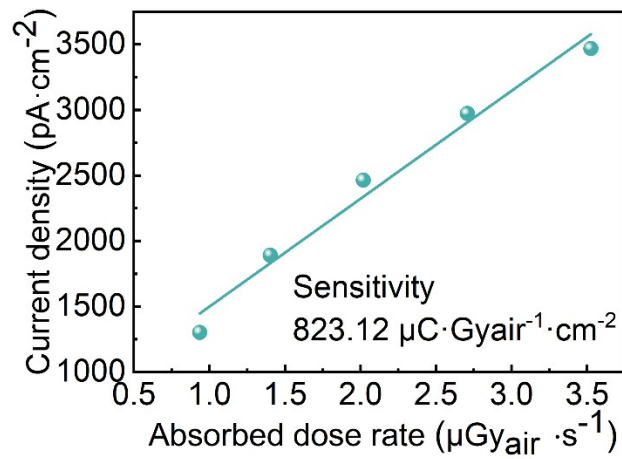

**Fig. S5** The current density as a function of absorbed dose rate with 9V bias illuminated by the X-ray tube voltage of 20kV<sub>p</sub>.

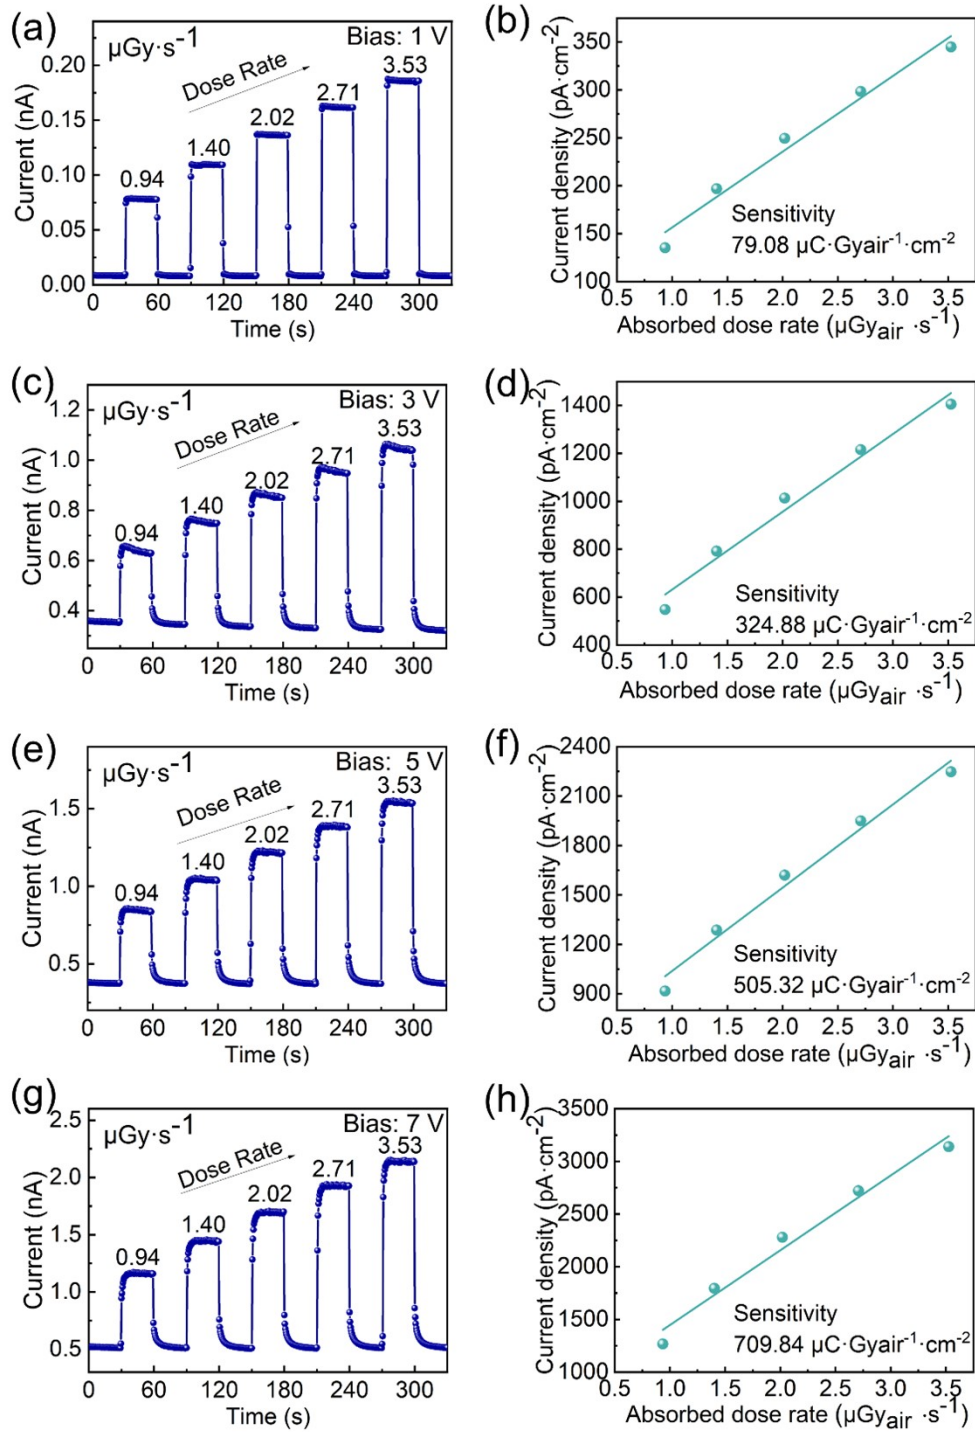

**Fig. S6** (a)(c)(e)(g) I-t curves of CsPbBr<sub>3</sub> detector under 1, 3, 5 and 7V bias illuminated under the X-ray tube voltage of 20 kV<sub>p</sub>. (b)(d)(f)(h) X-ray current density as a function of absorbed dose rate with 1, 3, 5 and 7V bias under the X-ray tube voltage of 20kV<sub>p</sub>.

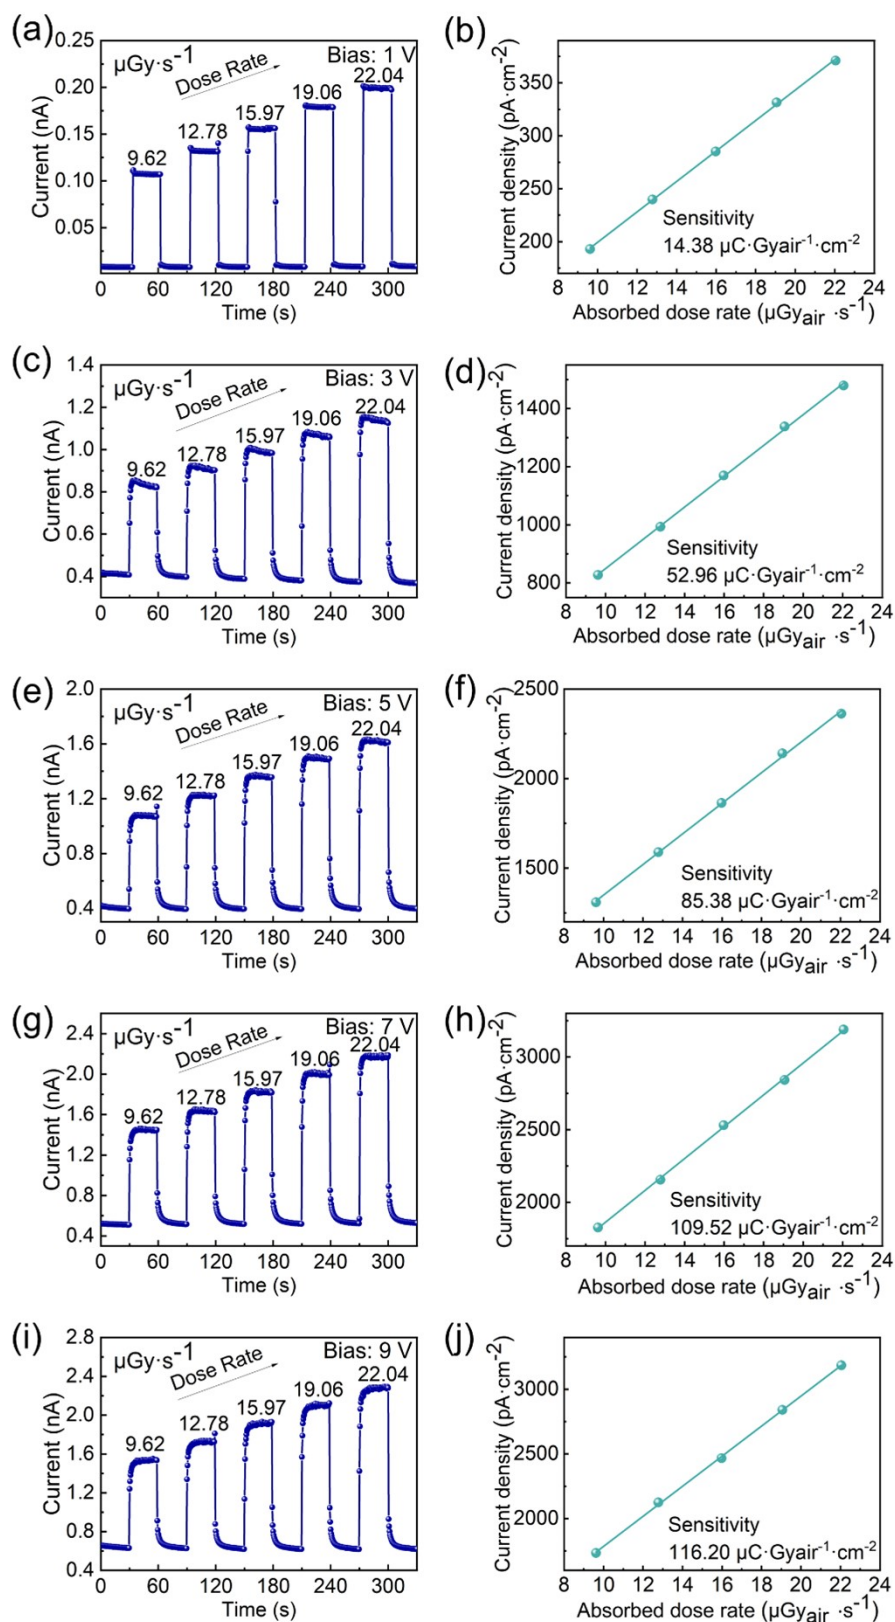

**Fig. S7** (a)(c)(e)(g)(i) I-t curves of CsPbBr<sub>3</sub> detector under 1, 3, 5, 7 and 9V bias illuminated under the X-ray tube voltage of 50 kV<sub>p</sub>. (b)(d)(f)(h)(j) X-ray current density as a function of absorbed dose rate with 1, 3, 5, 7 and 9V bias under the X-ray tube voltage of 50kV<sub>p</sub> respectively.

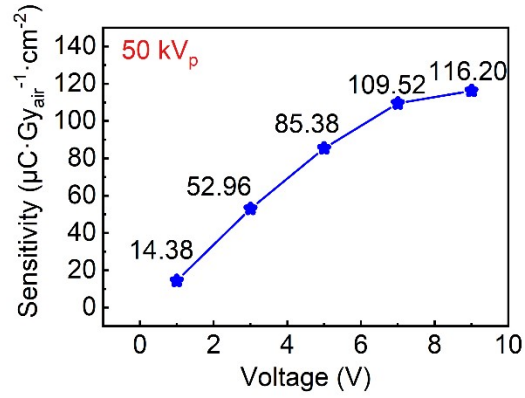

**Fig. S8** A line diagram of sensitivity as a function of bias voltage under the X-ray source of 50 kV<sub>p</sub>.

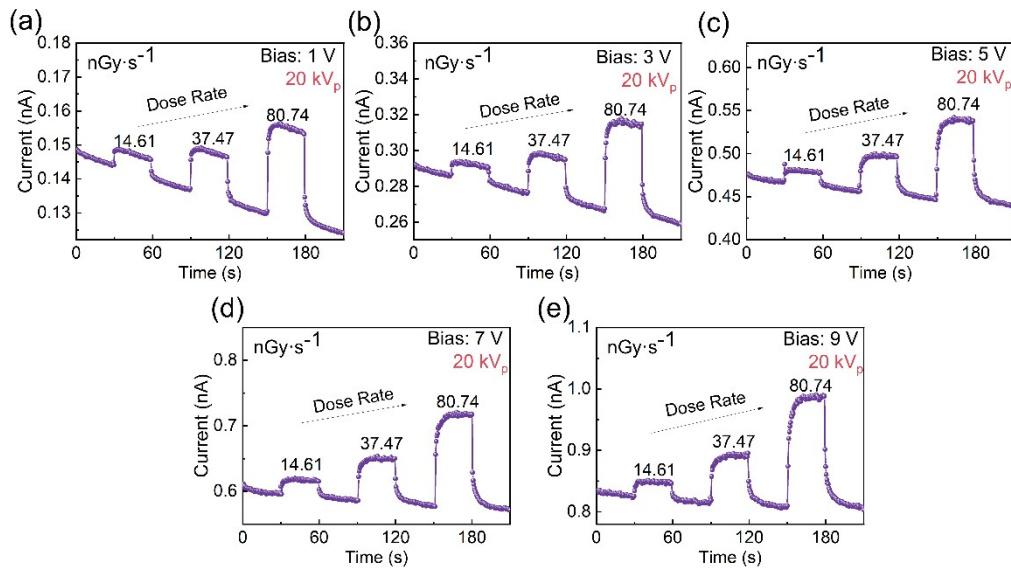

**Fig. S9** I-t curves of the CsPbBr<sub>3</sub> detector at 1, 3, 5, 7, 9 V bias under the 20 kV<sub>p</sub> Xray with the dose rate of 14.61, 37.47, 80.74 μGy<sub>air</sub>·s<sup>-1</sup>.
